# Supplementary material for: Strategic design of GalNAc-helical peptide ligands for efficient liver targeting
Source: Royal Society of Chemistry journal article supplement (doi:10.1039/d4sc05606j), 2024-01-01
Supplement: d4sc05606j1.pdf [file d4sc05606j1.pdf]

## Strategic Design of GalNAc-Helical Peptide Ligands for Efficient Liver Targeting

Takahito Ito,<sup>a,b</sup> Nobumichi Ohoka,<sup>c</sup> Michihiko Aoyama,<sup>d</sup> Takashi Nishikaze,<sup>e</sup> Takashi Misawa,<sup>a</sup> Takao Inoue,<sup>c</sup> Akiko Ishii-Watabe,<sup>d</sup> and Yosuke Demizu<sup>a,b,f,\*</sup>

<sup>a</sup> Division of Organic Chemistry, National Institute of Health Sciences, 3-25-26 Tonomachi, Kawasaki, Kanagawa 210-9501, Japan

<sup>b</sup> Graduate School of Medical Life Science, Yokohama City University, 1-7-29 Yokohama, Kanagawa, 230-0045, Japan

<sup>c</sup> Division of Molecular Target and Gene Therapy Products, National Institute of Health Sciences, Kanagawa, Japan

<sup>d</sup> Division of Biological Chemistry and Biologicals, National Institute of Health Sciences, 3-25-26 Tonomachi Kawasaki-ku, Kawasaki, Kanagawa 210-9501, Japan

<sup>e</sup> Solutions COE, Analytical & Measuring Instruments Division, Shimadzu Corporation, 1 Nishinokyo Kuwabara-cho, Nakagyo-ku, Kyoto, 604-8511, Japan

<sup>f</sup> Graduate School of Medicine, Dentistry and Pharmaceutical Sciences, Division of Pharmaceutical Science of Okayama University, 1-1-1 Tsushima-cho, Kita 700-8530, Japan

\* Corresponding author: Yosuke Demizu

## **Materials**

Reagents and solvents were purchased from Sigma-Aldrich Co. LLC, Watanabe Chemical Industries., Tokyo Chemical Industry Co. Ltd., Fujifilm Wako Pure Chemicals Co. Inc., Kanto Chemicals Co. Inc., Kishida Chemical Co. Ltd., Combi-blocks Inc., and CEM corporation. Biotinylated Tri-GalNAc was purchased from Sussex Research Laboratories Inc. Alexafluor-647-labeled Streptavidin was purchased from Jackson ImmunoResearch Laboratories Inc. Maleimide-functionalized Tri-GalNAc was purchased from Peptide Institute.

## **Instruments**

High resolution mass spectrometry was carried on using SHIMADZU LCMS-IT-TOF or LCMS-9050 equipped with electro spray ionization source. Analytical HPLC was carried on using JASCO analytical HPLC system. <sup>1</sup>H NMR and <sup>13</sup>C NMR spectra were recorded on JEOL ECZ-600 NMR spectrometer. Spectra were reported in ppm and are referenced to the residual solvent signal.

## **Analytical HPLC condition**

Column: J-Pak Core C18 (4.6 mm\*100 mm, 5 μm) (JASCO, Japan)

Solvent A: 0.1% TFA/water

Solvent B: 0.1% TFA/MeCN

Flow rate: 1.2 mL/min

Gradient: 10%~90% B over A in 10 min.

Detection: 220 nm or 254 nm

Temperature: 40 °C

## Synthesis of GalNAc-alkyne

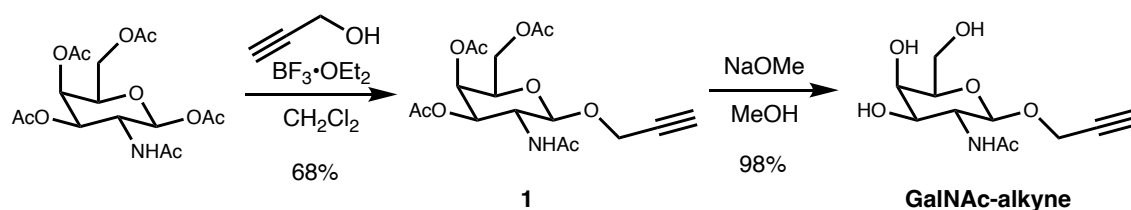

Penta-acetyl galactosamine (389 mg, 1.00 mmol) was dissolved in  $\text{CH}_2\text{Cl}_2$  and propargyl alcohol (162  $\mu\text{L}$ , 1.50 mmol) and molecular sieves 4A were added. After stirring at  $0^\circ\text{C}$  for 30 min,  $\text{BF}_3 \cdot \text{OEt}_2$  (230  $\mu\text{L}$ , 1.80 mmol) was added and bring to room temperature. After stirring for 17 h,  $\text{K}_2\text{CO}_3$  (100 mg) was added and stirred for 30 min. Reaction mixture was filtered through celite pad, filtrate was washed with water and Brine. Organic phase was dried over  $\text{Na}_2\text{SO}_4$  and concentrated under vacuum. Following procedures were done one more time. Residue was purified by silica gel column chromatography (*n*-Hexane : EtOAc = 1 : 9 to 0 : 10) to obtain compound **1** (260 mg, 68%) as a white foam.

Compound **1** (260 mg, 0.675 mmol) was dissolved in MeOH (7 mL) and NaOMe (15 mg, 0.270 mmol) was added. After stirring for 3 h, acidic ion exchange resin was added until the solution was neutralized. Reaction mixture was filtered and concentrated under vacuum to obtain GalNAc-alkyne (172 mg, 98%) as a white solid.

$^1\text{H}$  NMR (600 MHz,  $\text{CD}_3\text{OD}$ )  $\delta$  4.56 (d,  $J$  = 8.4 Hz, 1H), 4.36 (t,  $J$  = 2.7 Hz, 2H), 3.91 (dd,  $J$  = 10.6, 8.5 Hz, 1H), 3.82 (d,  $J$  = 3.1 Hz, 1H), 3.79-3.70 (m, 2H), 3.62 (dd,  $J$  = 10.7, 3.3 Hz, 1H), 3.50-3.48 (m, 1H), 2.83 (t,  $J$  = 2.4 Hz, 1H), 1.98 (s, 3H)

$^{13}\text{C}$  NMR (151 MHz,  $\text{CD}_3\text{OD}$ )  $\delta$  174.2, 100.8, 80.1, 76.9, 76.0, 73.1, 69.6, 62.5, 56.3, 54.0, 23.0.

HRMS-ESI ( $m/z$ ):  $[\text{M} + \text{Na}]^+$  calcd for  $\text{C}_{11}\text{H}_{19}\text{NO}_6\text{Na}^+$  282.0954, found 282.0928

The data was similar to previous report.<sup>1</sup>

## Synthesis of Tri-GalNAc-FITC

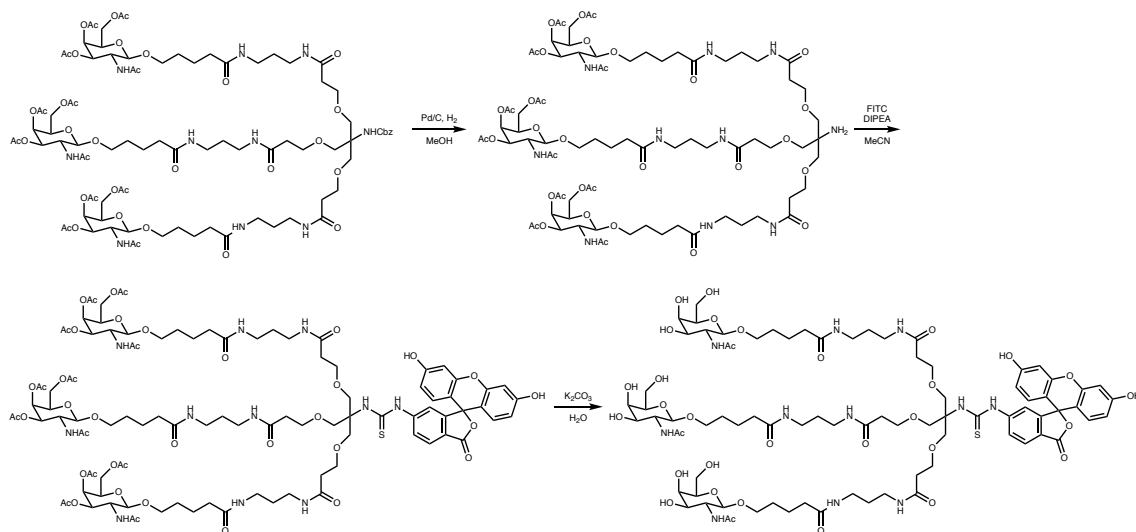

Cbz-Tri-GalNAc was synthesized following the previous report.<sup>2</sup> Cbz-Tri-GalNAc (100 mg, 51.9  $\mu$ mol) was dissolved in MeOH (1 mL), 10% Pd/C (10 mg) was added. Degassed the reaction mixture and substituted with H<sub>2</sub> atmosphere. After stirring for 18 h, the solution was filtered through celite pad and concentrated under vacuum. The residue was dissolved in MeCN (500  $\mu$ L), FITC (40 mg, 104  $\mu$ mol) and DIPEA (9.0  $\mu$ L, 51.9  $\mu$ mol) were added. After stirring for 27 h, the reaction mixture was purified by RP-HPLC using JASCO preparative HPLC system equipped with XBridge® Prep C18 OBD column (19 mm\*250 mm, 5  $\mu$ m, solvent A: 0.1% TFA/water, solvent B: 0.1% TFA/MeCN, flow rate: 10 mL/min, Gradient; B over A 45%~75% in 40 min). K<sub>2</sub>CO<sub>3</sub> (100 mg) was added to the HPLC fraction (30mL). After stirring for 18 h, the reaction mixture was concentrated under vacuum and purified by RP-HPLC using JASCO preparative HPLC system equipped with XBridge® Prep C18 OBD column (19 mm\*250 mm, 5  $\mu$ m, solvent A: 0.1% TFA/water, solvent B: 0.1% TFA/MeCN, flow rate: 10 mL/min, Gradient; B over A 45%~75% in 40 min) (Waters, MA). Fractions containing desired products were lyophilized to obtain (38.2 mg, 41% in 3 steps) as a yellow solid. The product was identified by LC-MS and checked purity by RP-HPLC equipped with J-Pak Core C18 (4.6 mm\*100 mm, 5  $\mu$ m, solvent A: 0.1% TFA/water, solvent B: 0.1% TFA/MeCN, flow rate: 1.2 mL/min, gradient: 10%~90% A over B in 10 min).

HRMS-ESI (m/z): [M + 2H]<sup>+</sup> calcd for C<sub>82</sub>H<sub>123</sub>N<sub>11</sub>O<sub>32</sub>S<sub>2</sub><sup>+</sup> 902.9023, found 902.9020

Purity: 98.8%, Rt = 3.98 min

## General synthetic procedure of 5S-FITC and LD-FITC

Peptides were synthesized by microwave-assisted solid phase method (Liberty Blue; CEM, NC) using DIC and Oxyma pure as a coupling agent, 20% piperidine in DMF for a deprotection reagent. Before synthesizing peptides, Protide LL Rink-amide resin (50  $\mu$ mol) was soaked in  $\text{CH}_2\text{Cl}_2$  : DMF = 1 : 1 solution. FITC (2 eq) and DIPEA (2 eq) were added to the DMF suspension (2 mL) of synthesized resin-bounded peptides. After agitating for 2 h, resin was washed with DMF and  $\text{CH}_2\text{Cl}_2$ . The Synthesized peptides were cleaved with cleavage cocktail (TFA :  $\text{H}_2\text{O}$  : TIPS = 95 : 2.5 : 2.5) for 45 min at 40  $^\circ\text{C}$ . Cleavage cocktail was removed by  $\text{N}_2$  gas stream and ether was poured to yield solid residues. Ether suspensions were centrifuged, and supernatants were removed. The final products were identified by LC-MS and checked purity by RP-HPLC.

## Synthesis of 5S-FITC

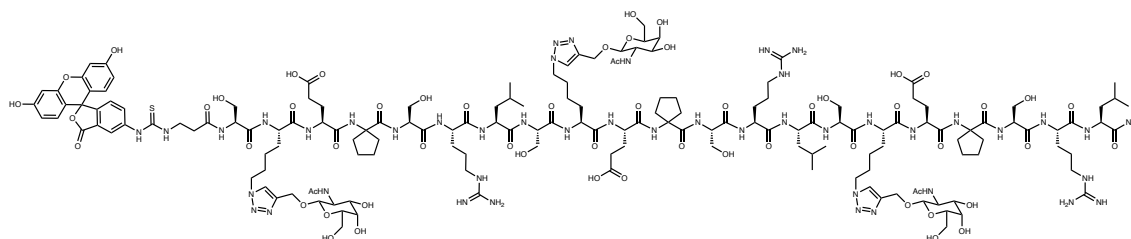

Following general synthesis procedure. Then, precipitate was dissolved in 50% MeCN aq. and purified by RP-HPLC using JASCO preparative HPLC system equipped with XBridge® Prep C18 OBD column (19 mm\*250 mm, 5  $\mu$ m, solvent A: 0.1% TFA/water, solvent B: 0.1% TFA/MeCN, flow rate: 10 mL/min, Gradient; B over A 10~50% in 40 min). Fractions containing desired products were lyophilized. Yielded peptide (14.2 mg) and GalNAc-alkyne (6 eq) were dissolved in 200  $\mu$ L of DMSO, then added 100  $\mu$ L of the mixture of  $\text{CuSO}_4 \cdot 5\text{H}_2\text{O}$  (1 eq) and Sodium ascorbate (1 eq) in water. The mixture was reacted under microwave irradiation for 1 h at 60  $^\circ\text{C}$ . Reaction mixture was purified by RP-HPLC (B over A 10~50% in 40 min). Fractions containing desired products were lyophilized to yield 5S-FITC (3.6 mg).

HRMS-ESI (m/z):  $[\text{M} + 4\text{H}]^+$  calcd for  $\text{C}_{162}\text{H}_{251}\text{N}_{45}\text{O}_{57}\text{S}^+$  942.6957, found 959.6957

Purity: 99.6%,  $\text{Rt}$  = 6.58 min

## Synthesis of 5-FITC

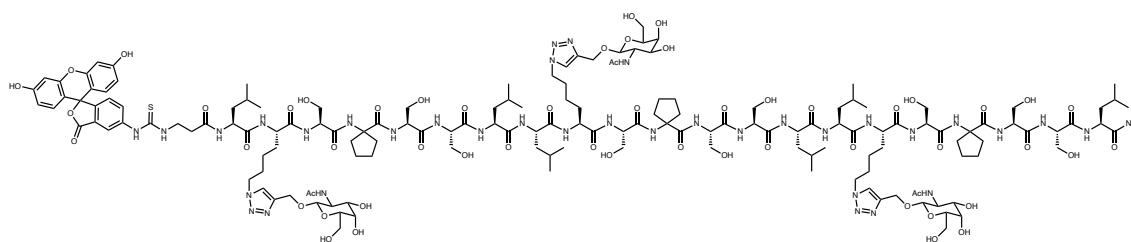

Peptide was synthesized by microwave-assisted solid phase method (Liberty Blue; CEM, NC). Synthesized peptide were cleaved with cleavage cocktail (TFA : H<sub>2</sub>O : TIPS = 95 : 2.5 : 2.5) for 30 min at 40 °C. Cleavage cocktail was removed by N<sub>2</sub> gas stream and ether was poured to yield solid residues. The precipitate was dissolved in 50% MeCN aq. and purified by RP-HPLC using JASCO preparative HPLC system equipped with XBridge® Prep C18 OBD column (19 mm\*250 mm, 5 μm, solvent A: 0.1% TFA/water, solvent B: 0.1% TFA/MeCN, flow rate: 10 mL/min, Gradient; B over A 60~80% in 10 min, 80~100% in 30 min). Fractions containing desired products were lyophilized. Yielded peptide (7.4 mg) and GalNAc-alkyne (3 eq per N<sub>3</sub> functional group) were dissolved in 200 μL of DMSO, then added 200 μL of the mixture of CuSO<sub>4</sub>•5H<sub>2</sub>O (2 eq) and Sodium ascorbate (2 eq) in water. The mixture was stirred for 23 h. Then, FITC (3 eq) and DIPEA (10 μL) was added and stirred for additional 20 h. Reaction mixture was purified by RP-HPLC (B over A 40~80% in 40 min). Fractions containing desired products were lyophilized to yield 5-FITC (0.5 mg).

HRMS-ESI (m/z): [M + 4H]<sup>+</sup> calcd for C<sub>156</sub>H<sub>242</sub>N<sub>36</sub>O<sub>54</sub>S<sup>+</sup> 878.9249, found 878.9245

Purity: >99%, Rt = 9.86 min

## Synthesis of LD-FITC

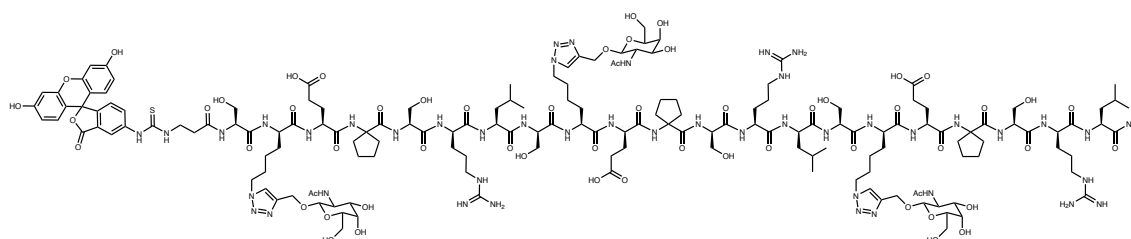

Following general synthesis procedure, then precipitate was dissolved in 50% MeCN aq. and purified by RP-HPLC using JASCO preparative HPLC system equipped with XBridge® Prep C18 OBD column (19 mm\*250 mm, 5 μm, solvent A: 0.1% TFA/water, solvent B: 0.1% TFA/MeCN, flow rate: 10 mL/min, Gradient; B over A 20~60% in 40 min). Fractions containing desired products were lyophilized. Yielded

peptide (11.2 mg) and GalNAc-alkyne (6 eq) were dissolved in 200  $\mu$ L of DMSO, then added 100  $\mu$ L of the mixture of  $\text{CuSO}_4 \cdot 5\text{H}_2\text{O}$  (1 eq) and Sodium ascorbate (1 eq) in water. The mixture was reacted under microwave irradiation for 1 h at 60  $^\circ\text{C}$ . Reaction mixture was purified by RP-HPLC (B over A 20~60% in 40 min). Fractions containing desired products were lyophilized to yield LD-FITC (2.0 mg).

HRMS-ESI (m/z):  $[\text{M} + 4\text{H}]^+$  calcd for  $\text{C}_{162}\text{H}_{251}\text{N}_{45}\text{O}_{57}\text{S}^+$  942.6957, found 959.6962

Purity: 97.6%,  $R_t$  = 6.77 min

### Synthesis of 5S-1-FITC

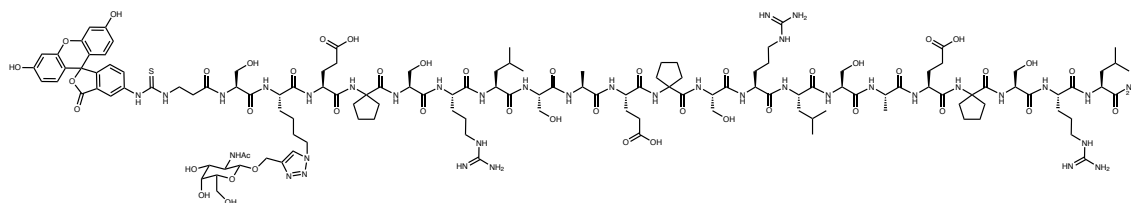

Following general synthesis procedure, then precipitate was dissolved in 50% MeCN aq. and purified by RP-HPLC using JASCO preparative HPLC system equipped with XBridge® Prep C18 OBD column (19 mm\*250 mm, 5  $\mu\text{m}$ , solvent A: 0.1% TFA/water, solvent B: 0.1% TFA/MeCN, flow rate: 10 mL/min, Gradient; B over A 20~60% in 40 min). Fractions containing desired products were lyophilized. Yielded peptide (16.0 mg) and GalNAc-alkyne (6 eq) were dissolved in 200  $\mu$ L of DMSO, then added 100  $\mu$ L of the mixture of  $\text{CuSO}_4 \cdot 5\text{H}_2\text{O}$  (1 eq) and Sodium ascorbate (1 eq) in water. The mixture was reacted under microwave irradiation for 1 h at 60  $^\circ\text{C}$ . Reaction mixture was purified by RP-HPLC (B over A 20%~60% in 40 min). Fractions containing desired products were lyophilized to yield 5S-1-FITC (6.0 mg).

HRMS-ESI (m/z):  $[\text{M} + 3\text{H}]^+$  calcd for  $\text{C}_{134}\text{H}_{206}\text{N}_{37}\text{O}_{45}\text{S}^+$  1028.4891, found 1028.4840

Purity: 99.8%,  $R_t$  = 6.77 min

### Synthesis of 5S-1'-FITC

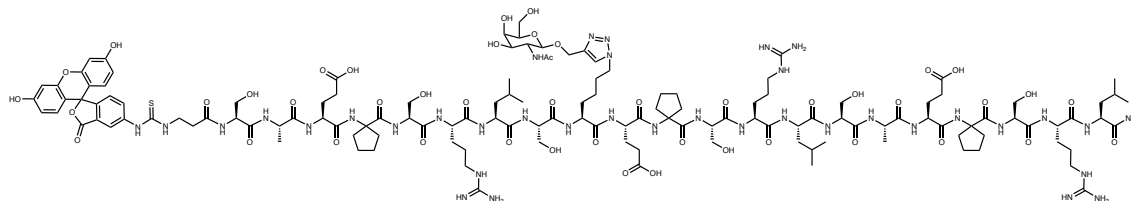

Following general synthesis procedure, then precipitate was dissolved in 50% MeCN aq. and purified by RP-HPLC using JASCO preparative HPLC system equipped with XBridge® Prep C18 OBD column (19 mm\*250 mm, 5  $\mu$ m, solvent A: 0.1% TFA/water, solvent B: 0.1% TFA/MeCN, flow rate: 10 mL/min, Gradient; B over A 35~70% in 40 min). Fractions containing desired products were lyophilized. Yielded peptide (14 mg) and GalNAc-alkyne (6 eq) were dissolved in 200  $\mu$ L of DMSO, then added 100  $\mu$ L of the mixture of CuSO<sub>4</sub>•5H<sub>2</sub>O (1 eq) and Sodium ascorbate (1 eq) in water. The mixture was reacted under microwave irradiation for 1 h at 60 °C. Reaction mixture was purified by RP-HPLC (B over A 35~70% in 40 min). Fractions containing desired products were lyophilized to yield 5S-1'-FITC (5.4 mg).

HRMS-ESI (m/z): [M + 3H]<sup>+</sup> calcd for C<sub>134</sub>H<sub>206</sub>N<sub>37</sub>O<sub>45</sub>S<sup>+</sup> 1028.4891, found 1028.4841

Purity: 99.8%, Rt = 6.83 min

### Synthesis of 5S-1''-FITC

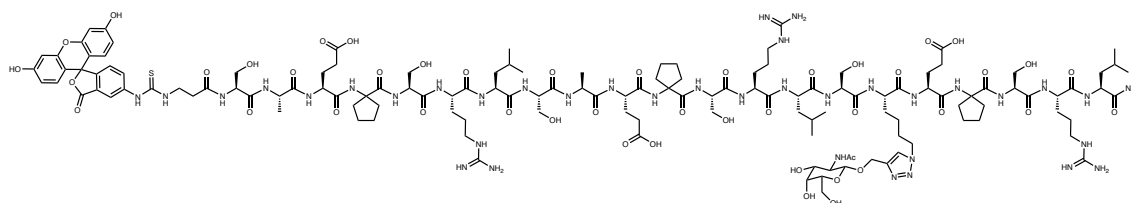

Following general synthesis procedure, then precipitate was dissolved in 50% MeCN aq. and purified by RP-HPLC using JASCO preparative HPLC system equipped with XBridge® Prep C18 OBD column (19 mm\*250 mm, 5  $\mu$ m, solvent A: 0.1% TFA/water, solvent B: 0.1% TFA/MeCN, flow rate: 10 mL/min, Gradient; B over A 35~70% in 40 min). Fractions containing desired products were lyophilized. Yielded peptide (9.5 mg) and GalNAc-alkyne (6 eq) were dissolved in 200  $\mu$ L of DMSO, then added 100  $\mu$ L of the mixture of CuSO<sub>4</sub>•5H<sub>2</sub>O (1 eq) and Sodium ascorbate (1 eq) in water. The mixture was reacted under microwave irradiation for 1 h at 60 °C. Reaction mixture was purified by RP-HPLC (B over A 35~70% in 40 min). Fractions containing desired products were lyophilized to yield 5S-1''-FITC (1.3 mg).

HRMS-ESI (m/z): [M + 4H]<sup>+</sup> calcd for C<sub>134</sub>H<sub>207</sub>N<sub>37</sub>O<sub>45</sub>S<sup>+</sup> 771.6186, found 771.6161

Purity: 97.9%, Rt = 6.83 min

## Synthesis of 5S-2-FITC

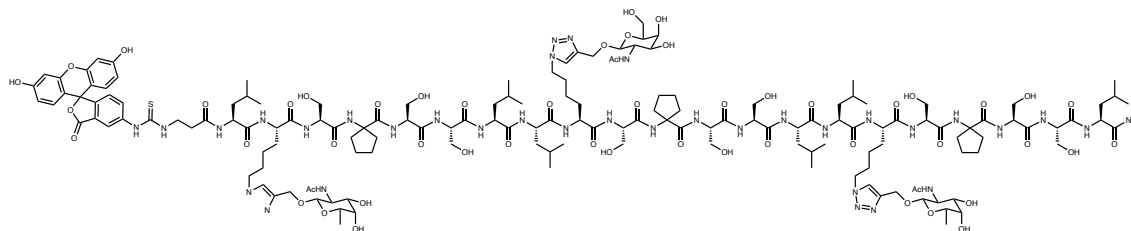

Following general synthesis procedure, then precipitate was dissolved in 50% MeCN aq. and purified by RP-HPLC using JASCO preparative HPLC system equipped with XBridge® Prep C18 OBD column (19 mm\*250 mm, 5  $\mu$ m, solvent A: 0.1% TFA/water, solvent B: 0.1% TFA/MeCN, flow rate: 10 mL/min, Gradient; B over A 20~60% in 40 min). Fractions containing desired products were lyophilized. Yielded peptide (16.0 mg) and GalNAc-alkyne (6 eq) were dissolved in 200  $\mu$ L of DMSO, then added 100  $\mu$ L of the mixture of  $\text{CuSO}_4 \cdot 5\text{H}_2\text{O}$  (1 eq) and Sodium ascorbate (1 eq) in water. The mixture was reacted under microwave irradiation for 1 h at 60  $^\circ\text{C}$ . Reaction mixture was purified by RP-HPLC (B over A 20%~60% in 40 min). Fractions containing desired products were lyophilized to yield 5S-2-FITC (3.4 mg).

HRMS-ESI (m/z):  $[\text{M} + 4\text{H}]^+$  calcd for  $\text{C}_{148}\text{H}_{229}\text{N}_{41}\text{O}_{51}\text{S}^+$  857.1571, found 857.1558

Purity: 96.5%,  $R_t$  = 6.64 min

## Synthesis of 5S-2'-FITC

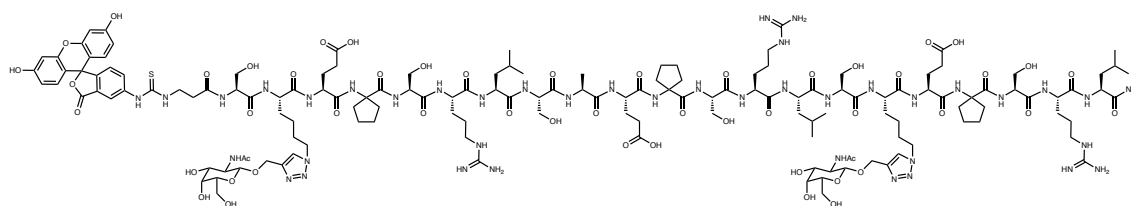

Following general synthesis procedure, then precipitate was dissolved in 50% MeCN aq. and purified by RP-HPLC using JASCO preparative HPLC system equipped with XBridge® Prep C18 OBD column (19 mm\*250 mm, 5  $\mu$ m, solvent A: 0.1% TFA/water, solvent B: 0.1% TFA/MeCN, flow rate: 10 mL/min, Gradient; B over A 30~65% in 40 min). Fractions containing desired products were lyophilized. Yielded peptide (9.0 mg) and GalNAc-alkyne (6 eq) were dissolved in 200  $\mu$ L of DMSO, then added 100  $\mu$ L of the mixture of  $\text{CuSO}_4 \cdot 5\text{H}_2\text{O}$  (1 eq) and Sodium ascorbate (1 eq) in water.

The mixture was reacted under microwave irradiation for 1 h at 60 °C. Reaction mixture was purified by RP-HPLC (B over A 30%~65% in 40 min). Fractions containing desired products were lyophilized to yield 5S-2'-FITC (3.5 mg).

HRMS-ESI (m/z):  $[M + 4H]^+$  calcd for  $C_{148}H_{229}N_{41}O_{51}S^+$  857.1571, found 857.1530

Purity: 99.4%,  $R_t$  = 6.73 min

### Synthesis of 5S-2''-FITC

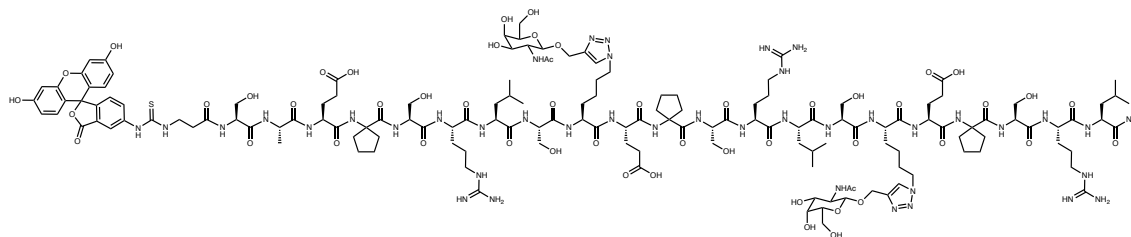

Following general synthesis procedure, then precipitate was dissolved in 50% MeCN aq. and purified by RP-HPLC using JASCO preparative HPLC system equipped with XBridge® Prep C18 OBD column (19 mm\*250 mm, 5  $\mu$ m, solvent A: 0.1% TFA/water, solvent B: 0.1% TFA/MeCN, flow rate: 10 mL/min, Gradient; B over A 30~65% in 40 min). Fractions containing desired products were lyophilized. Yielded peptide (16.0 mg) and GalNAc-alkyne (6 eq) were dissolved in 200  $\mu$ L of DMSO, then added 100  $\mu$ L of the mixture of  $CuSO_4 \cdot 5H_2O$  (1 eq) and Sodium ascorbate (1 eq) in water. The mixture was reacted under microwave irradiation for 1 h at 60 °C. Reaction mixture was purified by RP-HPLC (B over A 30~65% in 40 min). Fractions containing desired products were lyophilized to yield 5S-2''-FITC (2.9 mg).

HRMS-ESI (m/z):  $[M + 4H]^+$  calcd for  $C_{148}H_{229}N_{41}O_{51}S^+$  857.1571, found 857.1533

Purity: >99%,  $R_t$  = 6.73 min

### Synthesis of 5S-Bio

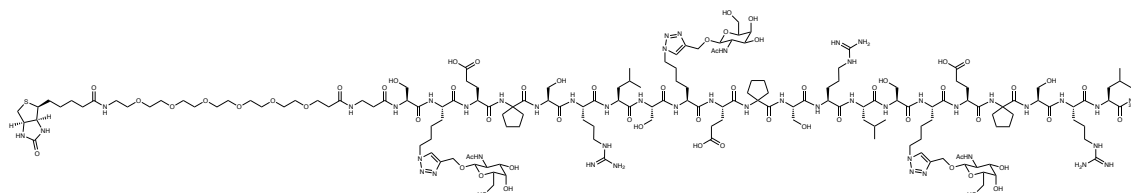

Peptide was synthesized by microwave-assisted solid phase method (Liberty Blue; CEM, NC). Biotin-PEG6-CO<sub>2</sub>H (4 eq), COMU (4 eq) and DIPEA (8 eq) were added to the DMF suspension (2 mL) of synthesized resin-bound peptides. After agitating for

2 h, resin was washed with DMF and CH<sub>2</sub>Cl<sub>2</sub>. The Synthesized peptide was cleaved with cleavage cocktail (TFA : H<sub>2</sub>O : TIPS = 95 : 2.5 : 2.5) for 45 min at 40 °C. Cleavage cocktail was removed by N<sub>2</sub> gas stream and ether was poured to yield solid residues. Ether suspensions were centrifuged, and supernatants were removed. The precipitate was dissolved in 50% MeCN aq. and purified by RP-HPLC using JASCO preparative HPLC system equipped with XBridge® Prep C18 OBD column (19 mm\*250 mm, 5 μm, solvent A: 0.1% TFA/water, solvent B: 0.1% TFA/MeCN, flow rate: 10 mL/min, Gradient; B over A 20~60% in 40 min). Fractions containing desired products were lyophilized. Yielded peptide (19.1 mg) and GalNAc-alkyne (6 eq) were dissolved in 300 μL of DMSO, then added 200 μL of the mixture of CuSO<sub>4</sub>•5H<sub>2</sub>O (1 eq) and Sodium ascorbate (1 eq) in water. The mixture was reacted under microwave irradiation for 1 h at 60 °C. Reaction mixture was purified by RP-HPLC (B over A 20%~60% in 40 min). Fractions containing desired products were lyophilized to yield 5S-Bio (18.6 mg).

HRMS-ESI (m/z): [M + 4H]<sup>+</sup> calcd for C<sub>166</sub>H<sub>283</sub>N<sub>47</sub>O<sub>61</sub>S<sup>+</sup> 985.7547, found 985.7547

Purity: 96.9%, Rt = 6.27 min

## Synthesis of mal-5S

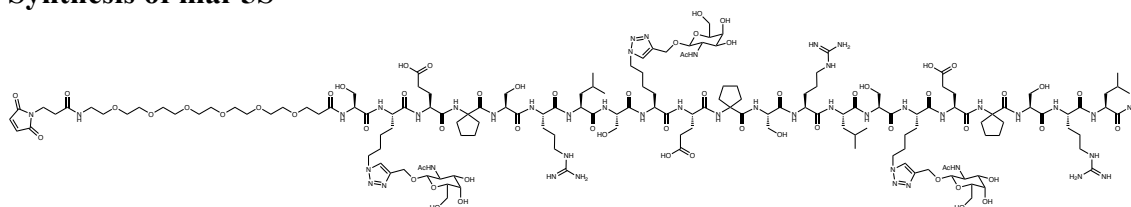

GalNAc conjugated Peptide 5S without β-alanine was synthesized following the method of synthesis of 5S. Mal-PEG6-CO<sub>2</sub>H (4 eq), HSTU (4 eq) and DIPEA (8 eq) were dissolved in DMF (40 μL) and reacted for 10 min. DMF solution was added to the solution of GalNAc conjugated Peptide 5S (18.1 mg) in 0.1 M Tris-HCl (pH 8.3) (200 μL) and stirred for 14 h at room temperature. Reaction mixture was purified by RP-HPLC (B over A 30%~70% in 40 min) to yield mal-5S (18.0 mg)

HRMS-ESI (m/z): [M + 4H]<sup>+</sup> calcd for C<sub>160</sub>H<sub>269</sub>N<sub>45</sub>O<sub>61</sub>S<sup>+</sup> 949.2327, found 949.2299

Purity: >99%, Rt = 6.59 min

### **In silico structural prediction**

The in silico-based peptide modeling was performed on MOE 2022.07 software (CCD). Peptide conformation minimization is carried on by molecular dynamics (MD) as initial conformation set to the  $\alpha$ -helical structure. The force fields are set to AMBER-10.

The flexibility of side-chain was determined by MD following the program below.

| Time (ps) | Step           | Temp (K) |
|-----------|----------------|----------|
| 0–10      | Minimalization | 0        |
| 10–110    | Heating        | 10~300   |
| 110–210   | Equilibration  | 300      |
| 210–510   | Production     | 300      |

### **CD spectrometry**

CD spectra were recorded on JASCO J-1100 CD spectrometer using a 1.0 mm path length cell. The data are expressed in terms of  $[\theta]$ ; i.e., total molar ellipticity (deg cm<sup>2</sup> dmol<sup>-1</sup>). 20 mM phosphate buffer solution (pH = 7.4) or 50% MeCN aq. were used as a solvent and peptide concentration was 100  $\mu$ M. The helicity was evaluated on secondary structure analysis add-in on JASCO spectra manager software based on Yang's reference CD spectra.<sup>3</sup>

### **Cellular uptake evaluation**

HepG2 cells were seeded (150,000 cells per well in a 24-well plate) and incubated for overnight before experiment. Medium was removed and cells washed with D-PBS (-). Cells were incubated with 5  $\mu$ M of ligands in Dulbecco's modified Eagle's medium (DMEM) low glucose with 10% FBS and 1% penicillin/streptomycin for 2 h. After incubation, the cell were collected by trypsin treatment and washed with D-PBS(-), then suspended in D-PBS(-), then supplemented with 2% FBS. Suspension was filtered before flow cytometry analysis. Data was collected by Acculi C6 Plus Flowcytometer (BD Biosciences) The value shown in the article is expressed in relative MFI defined as Tri-GalNAc as one. Significant differences were calculated by the Dunnett's test for Tri-

GalNAc-FITC using EZR software.<sup>4</sup>

The cellular uptake study on non-hepatocytes were conducted with the same method above using HeLa cells (125,000 cells per well in a 24-well plate) as an alternative cultured in DMEM high glucose.

### **Binding activity studies against ASGPR using live cells**

HepG2 cells were seeded (150,000 cells per well in a 24-well plate) and incubated for overnight before experiment. Medium was removed and cells washed with D-PBS (-). Cells were incubated with 5  $\mu$ M of ligands and 0.03 mM~100 mM of GalNAc in DMEM low glucose with 10% FBS and 1% penicillin/streptomycin for 2 h. After incubation, the cell were collected by trypsin treatment and washed with D-PBS(-), then suspended in D-PBS(-), then supplemented with 2% FBS. Suspension was filtered before flow cytometry analysis. Mean fluorescence intensity of each concentration of GalNAc was plotted and drew inhibition curve using Kaleida graph software (Synergy Software).

### **Internalization study of streptavidin**

HepG2 cells were seeded (150,000 cells per well in a 24-well plate) and incubated for overnight before experiment. Medium was removed and cells washed with D-PBS (-). Cells were incubated with 250 nM of Alexa Fluor 647 labelled streptavidin and 1  $\mu$ M biotinylated ligands in DMEM low glucose with 10% FBS and 1% penicillin/streptomycin for 2 h. After incubation, the cell were collected by trypsin treatment and washed with D-PBS(-), then suspended in D-PBS(-), then supplemented with 2% FBS. Suspension was filtered before flow cytometry analysis. Data was collected by Acculi C6 Plus Flowcytometer (BD Biosciences).

### **Synthesis method of 5S-ctx**

DTPA (161  $\mu$ L, 10 mM in PBS, final concentration 1 mM) and sodium tetraborate decahydrate (30.8 mg, final concentration 50 mM) to cetuximab (1372  $\mu$ L, 5 mg/mL in PBS) (Merck & Co., NJ). The solution was treated with TCEP (6 eq, 10 mM in PBS) for 2 h at 37 °C. The solution was applied on MidiTrap G-25 column (preequilibrated with PBS containing 1 mM DTPA). The column was centrifuged for 2

min (1000 x g). Eluate was kept in refrigerator (4 °C), then mal-5S (10 eq, 10 mM in water) was added and incubated for 1 h at 4 °C. The solution was applied on MidiTrap G-25 column (preequilibrated with PBS). The column was centrifuged for 2 min (1000 x g). MidiTrap G-25 column was washed out with PBS by centrifuging for 2 min (1000 x g). The eluent was combined and concentrated using Amicon 10K for 15 min (7500 x g). The concentration was determined by measuring UV absorbance at 280 nm.

### **Synthesis method of Tri-ctx**

DTPA (111 µL, 10 mM in PBS, final concentration 1 mM) and sodium tetraborate decahydrate (21.2 mg, final concentration 50 mM) to cetuximab (1000 µL, 5 mg/mL in PBS). The solution was treated with TCEP (6 eq, 10 mM in PBS) for 2 h at 37 °C. The solution was applied on MidiTrap G-25 column (preequilibrated with PBS containing 1 mM DTPA). The column was centrifuged for 2 min (1000 x g). Eluate was kept in refrigerator (4 °C), then mal-Tri-GalNAc (10 eq, 4.9 mM in water) was added and incubated for 1 h at 4 °C. The solution was applied on MidiTrap G-25 column (preequilibrated with PBS). The column was centrifuged for 2 min (1000 x g). The concentration was determined by measuring UV absorbance at 280 nm.

### **Degradation study of EGFR**

HepG2 cell line (ATCC) cultured in DMEM (Merck) and supplemented with 10% heat inactivated FBS and 100 µg/mL Kanamycin (Merck). Cells were maintained in humidified incubator with 95% air/5%CO<sub>2</sub> at 37°C. HepG2 cells were treated with various concentrations of compounds for 24 h in 6 well plate. Cells were lysed with SDS lysis buffer (0.1M Tris-HCl, pH 8.0, 10% glycerol, 1% SDS) and immediately boiled for 10 min to obtain clear lysates. Protein concentrations were measured using Pierce<sup>TM</sup> BCA protein assay kit (Thermo Fisher Scientific). Lysates containing equal amounts of proteins were separated by SDS-PAGE and transferred to PVDF membranes (Merck, Germany) for Western blot analysis using the appropriate antibodies. Immunoreactive proteins were visualized using the Immobilon Western chemiluminescent HRP substrate (Merck) or Clarity Western ECL substrate (Bio-Rad); light emission intensity was quantified using an LAS-3000 lumino-image analyzer equipped with Image Gauge v2.3 software (Fuji).

The antibodies used in this study were: anti-EGFR antibody (1:1000, #4267, Cell signaling),  $\beta$ -actin antibody (1:2000, #A2228, Merck), anti-rabbit-IgG-HRP (1:5000, #NA934, GE Healthcare) and anti-mouse-IgG-HRP (1:5000, #NA931, GE Healthcare).

#### **Evaluation of EGFR clearance activity of ligand-cetuximab conjugates**

HepG2 cells in DMEM high glucose supplemented with GlutaMAX™ (Thermo) and 10% FBS were seed (50000 cells per well in a 24-well plate) and incubated for overnight before experiment. The cells were incubated with 1 nM ctx, Tri-ctx, and 5S-ctx for 2, 4, 8, 16, 24 h at 37°C. The cells were washed with PBS, and collected by Accutase (Nacalai tesque) treatment. The cells were incubated with 1.5  $\mu$ g/mL Alexa Fluor 488 labelled F(ab')<sub>2</sub> Fragment Goat Anti-Human IgG, Fc $\gamma$  Fragment Specific (Jackson ImmunoResearch) in FACS stain buffer (PBS with 0.5% BSA, 0.1%NaN<sub>3</sub>, and 2 mM EDTA) for 30 min on ice. The data were collected by FACSCanto II (BD Biosciences). The EGFR internalization of ctx, Tri-ctx, and 5S-ctx are indicated as the mean fluorescence intensity (MFI) of four samples. Error bars represent the standard error of four samples.

#### **DAR analysis of ligand-cetuximab conjugates**

Cetuximab conjugates (100  $\mu$ L) were treated with PNGaseF (5  $\mu$ L) (Promega) for 25 h at 37 °C. The solution was desalted using Amicon 3K for 30 min (14000 x g). Pure water (200  $\mu$ L) was added and repeated previous step for 3 times. Final concentration was determined by measuring UV absorbance at 280 nm. The sample was mixed with 20 mg/mL sinapinic acid in 50% MeCN, 0.1% TFA in a same volume and dropped to a sample plate. Mass spectra was collected by SHIMADZU MALDI-8020 and detected on positive-ion linear mode. BSA was used for external standard to calibrate.

Mass spectra of 5S-ctx and DAR calculation

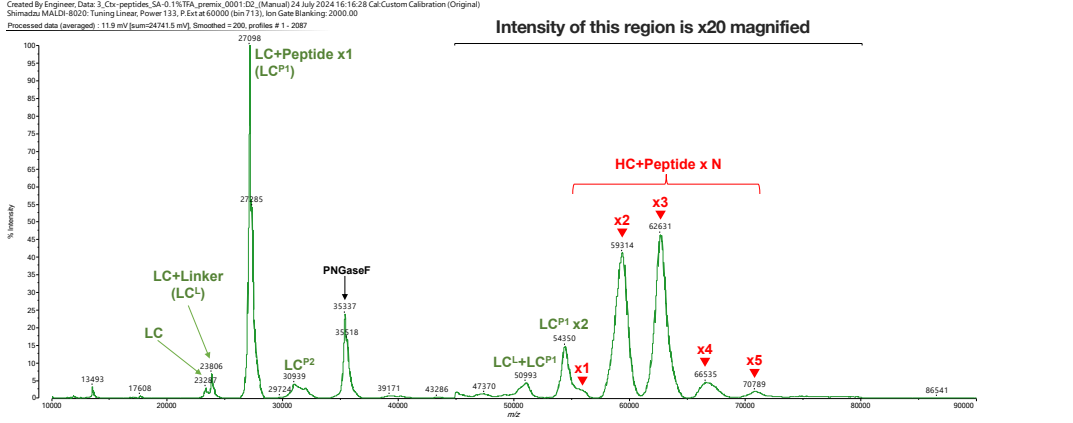

|    | DAR | Intensity(mV) | Ratio | Average DAR of each subunit | Average DAR |
|----|-----|---------------|-------|-----------------------------|-------------|
| LC | 0   | 698.5         | 2.6%  | 1.01                        | 7.20        |
|    | 1   | 24742.5       | 93.6% |                             |             |
|    | 2   | 981.8         | 3.7%  |                             |             |
| HC | 1   | 32.8          | 2.8%  | 2.59                        |             |
|    | 2   | 509.7         | 43.1% |                             |             |
|    | 3   | 573.7         | 48.5% |                             |             |
|    | 4   | 43.5          | 3.7%  |                             |             |
|    | 5   | 23.4          | 2.0%  |                             |             |

Mass spectra of Tri-ctx and DAR calculation

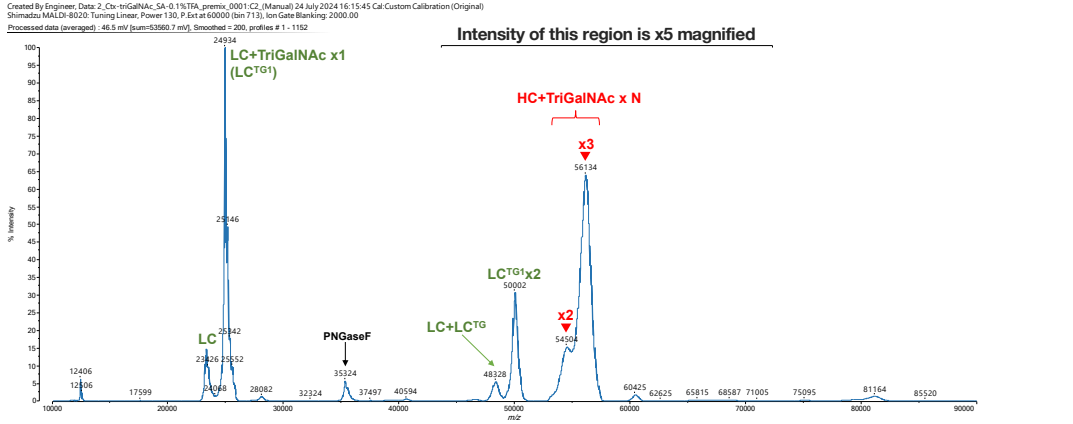

|  | DAR | Intensity(mV) | Ratio | Average DAR of each subunit | Average DAR |
|--|-----|---------------|-------|-----------------------------|-------------|
|  |     |               |       |                             |             |

|    |   |         |       |      |      |
|----|---|---------|-------|------|------|
| LC | 0 | 7880.6  | 12.8% | 0.87 | 7.36 |
|    | 1 | 53560.7 | 87.2% |      |      |
| HC | 2 | 1642    | 19.4% | 2.81 |      |
|    | 3 | 6841.3  | 80.6% |      |      |

## <sup>1</sup>H- and <sup>13</sup>C-NMR spectra of GalNAc-alkyne

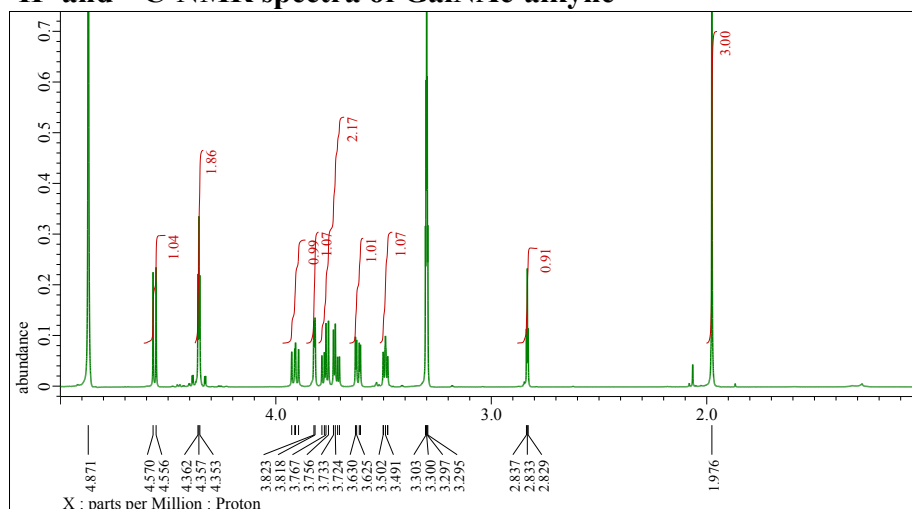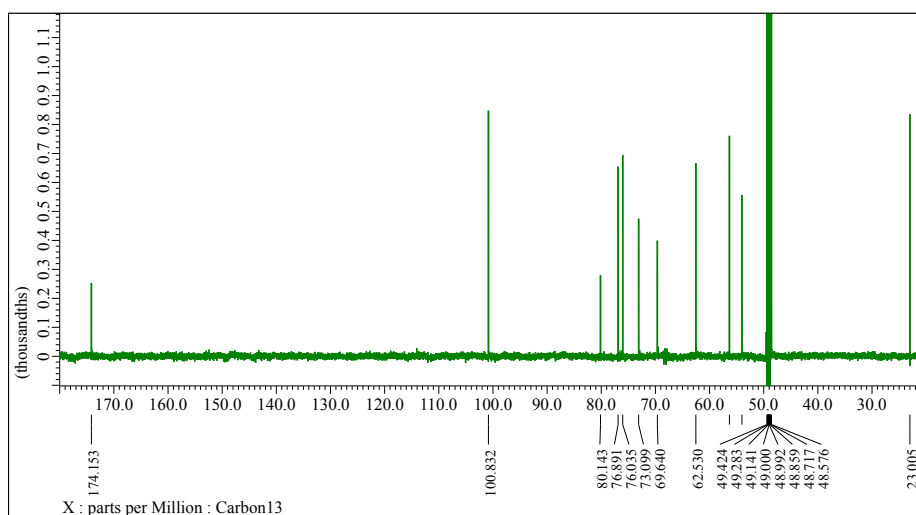

## HR-MS chromatogram of GalNAc-alkyne

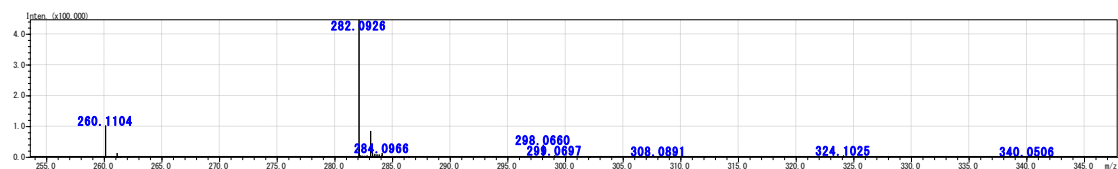

HR-MS chromatogram of Tri-GalNAc

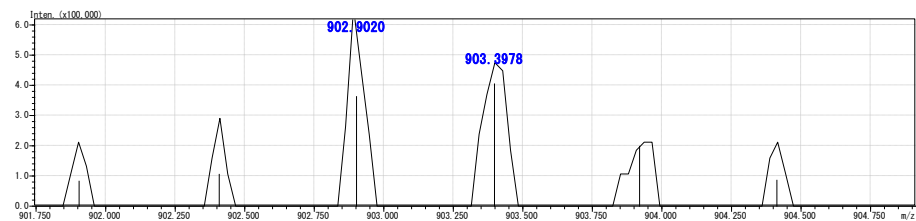

HPLC chromatogram of Tri-GalNAc

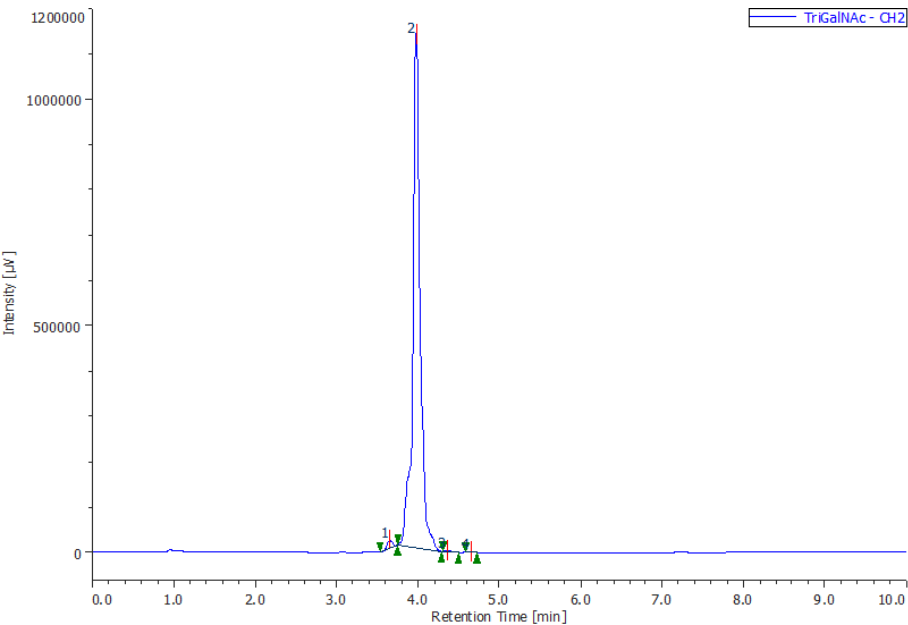

HR-MS chromatogram of 5S

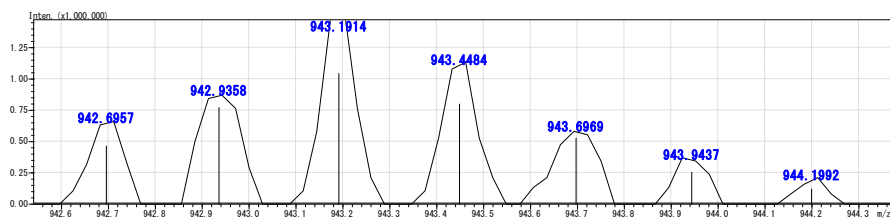

HPLC chromatogram of 5S

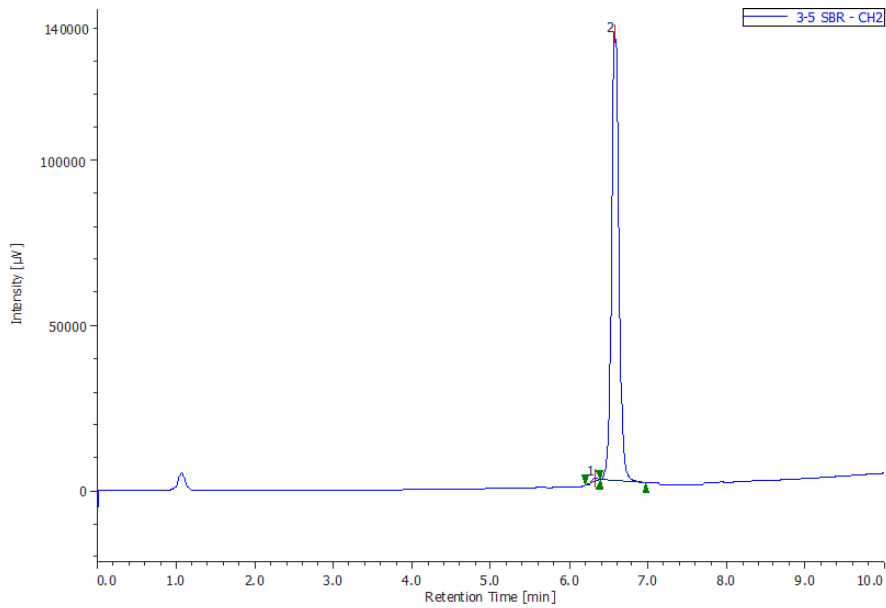

HR-MS chromatogram of 5

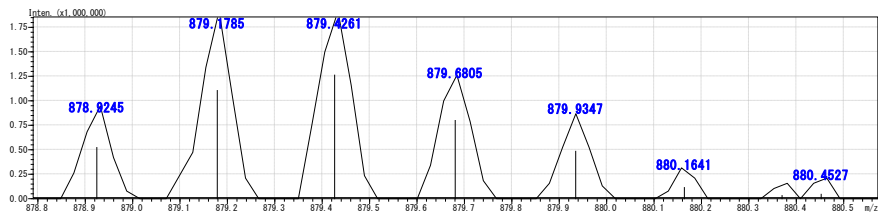

HPLC chromatogram of 5

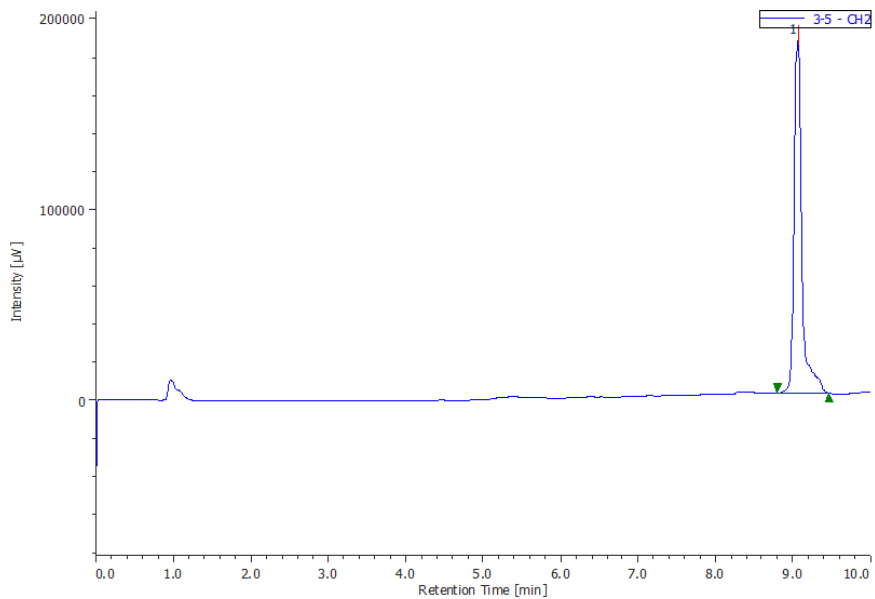

HR-MS chromatogram of LD

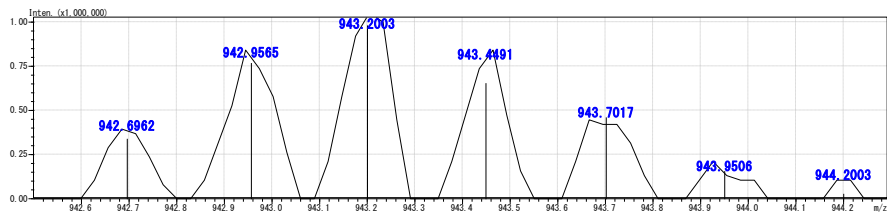

HPLC chromatogram of LD

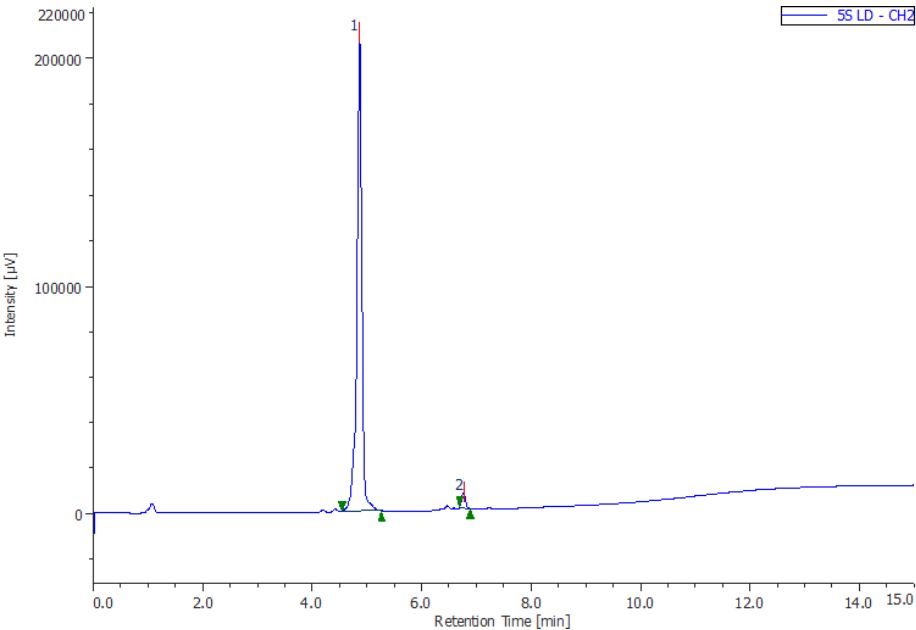

HR-MS chromatogram of 5S-1

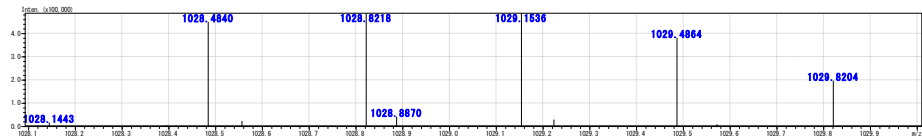

HPLC chromatogram of 5S-1

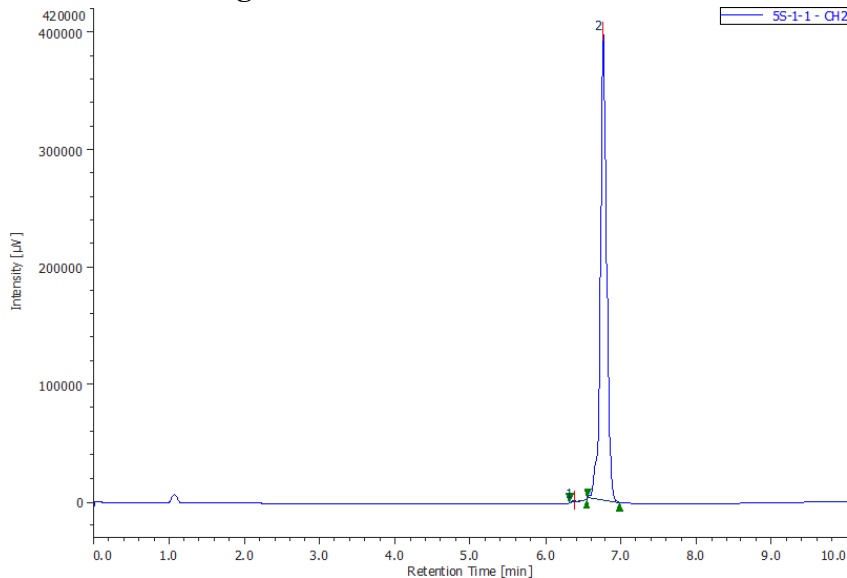

HR-MS chromatogram of 5S-1'

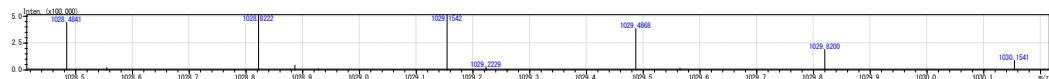

HPLC chromatogram of 5S-1'

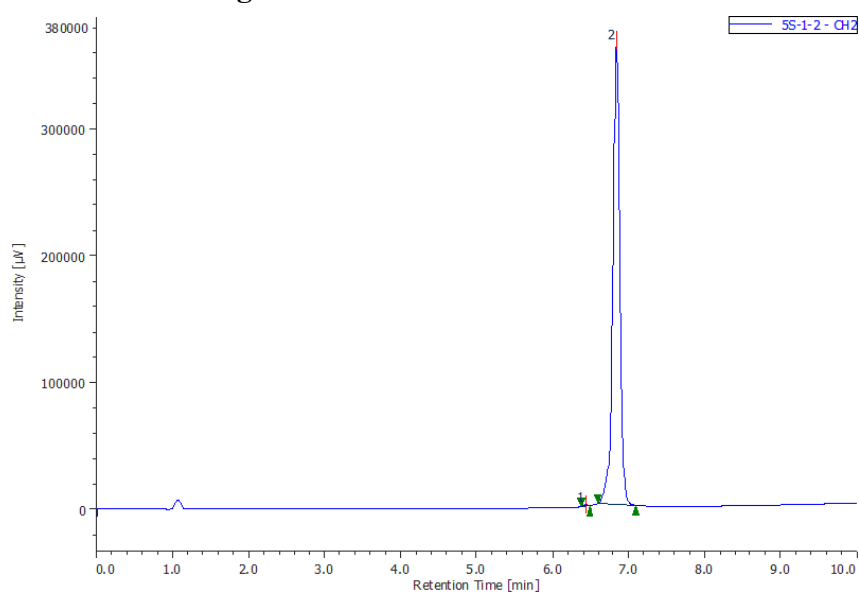

HR-MS chromatogram of 5S-1”

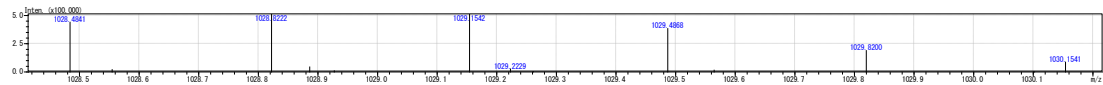

HPLC chromatogram of 5S-1”

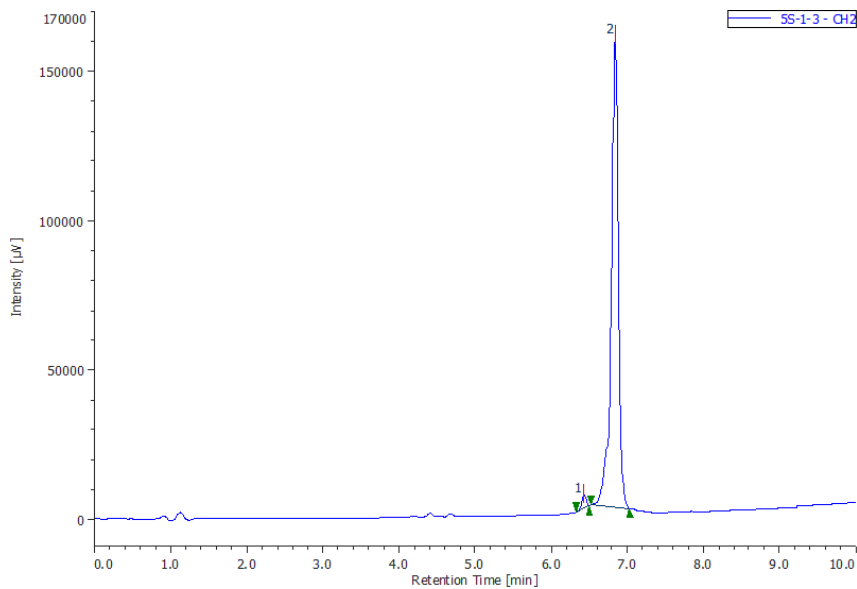

HR-MS chromatogram of 5S-2

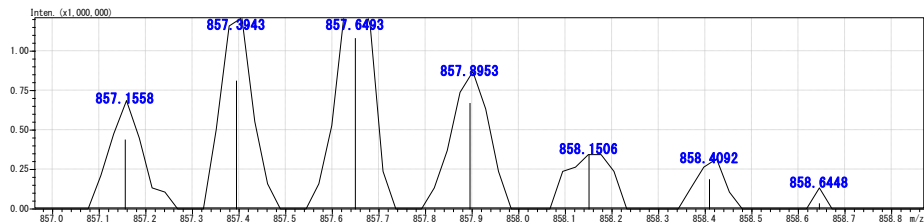

HPLC chromatogram of 5S-2

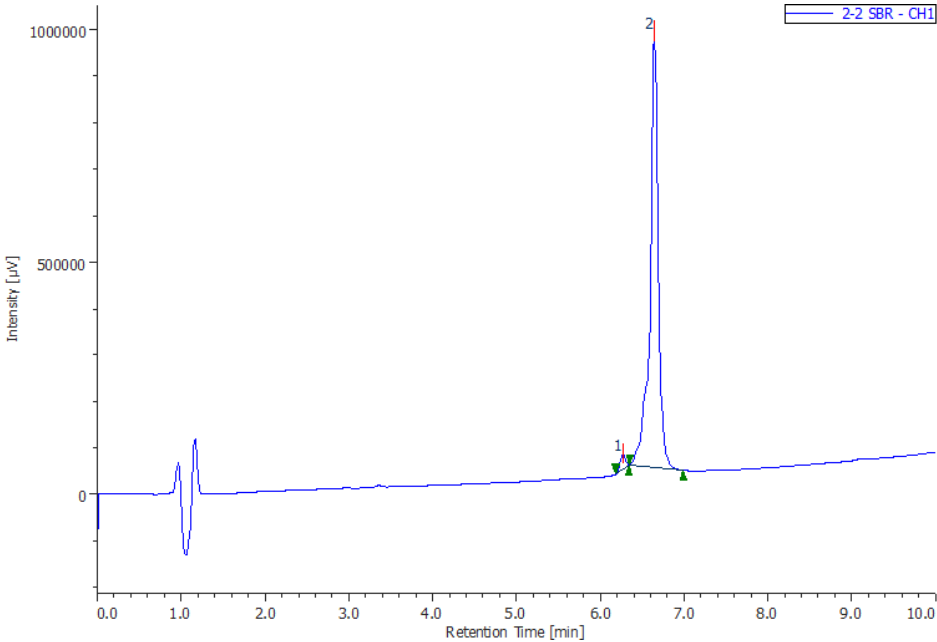

HR-MS chromatogram of 5S-2'

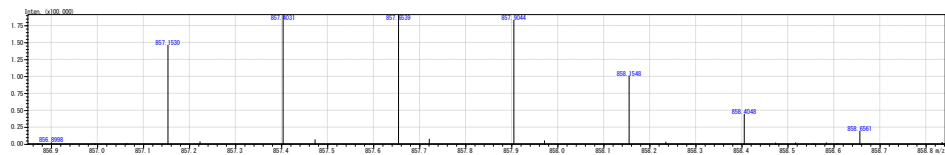

HPLC chromatogram of 5S-2'

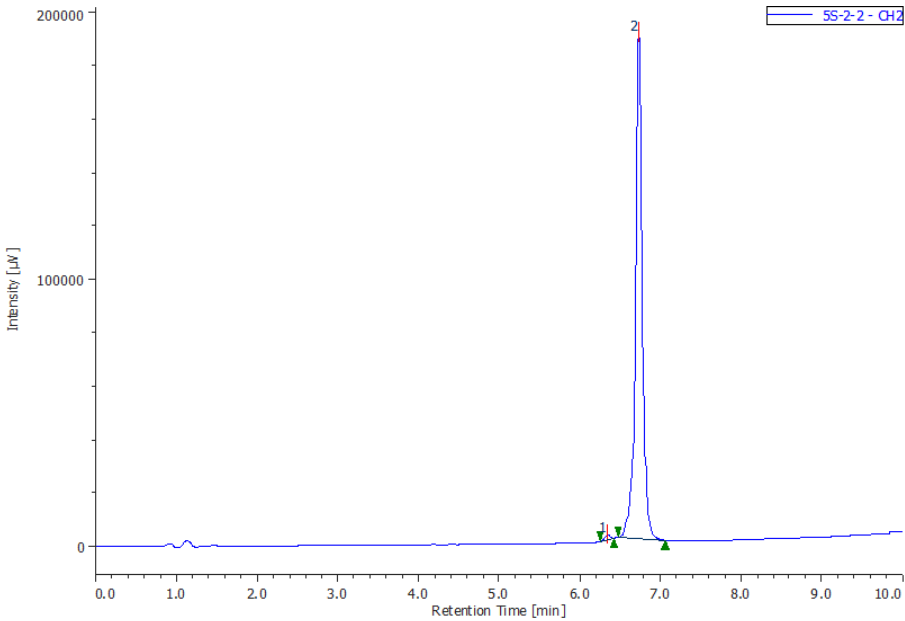

HR-MS chromatogram of 5S-2''

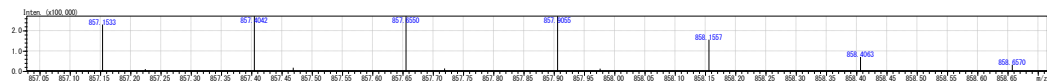

HPLC chromatogram of 5S-2''

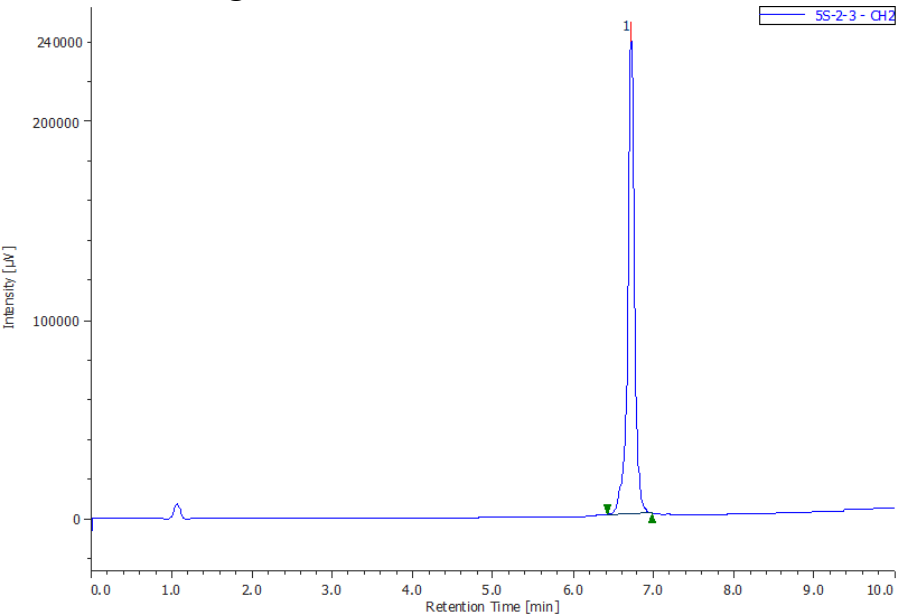

HR-MS chromatogram of 5S-Bio

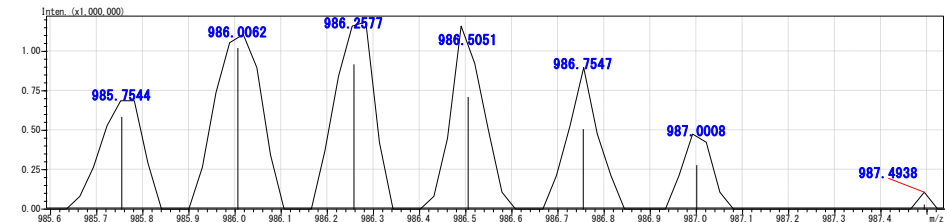

HPLC chromatogram of 5S-Bio

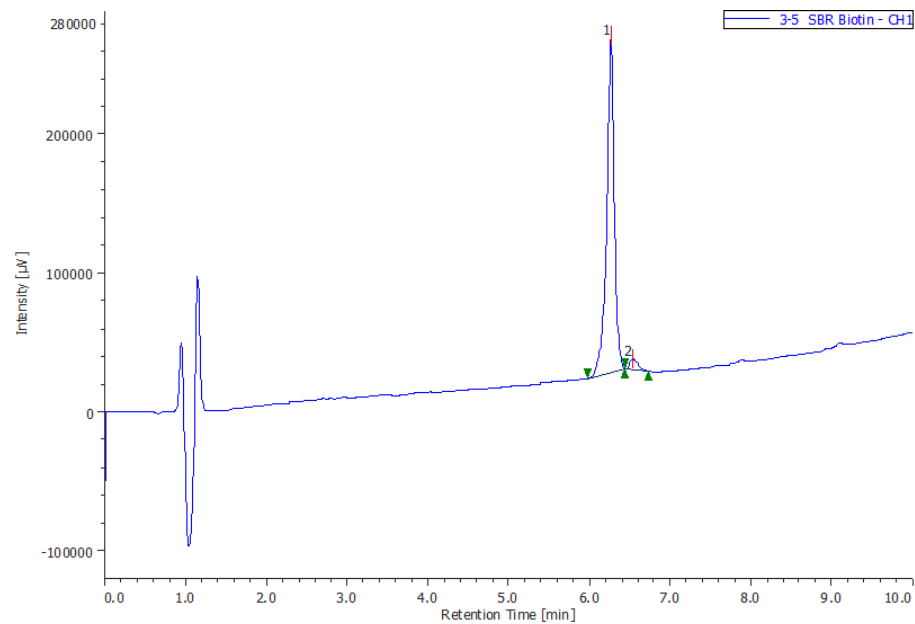

HR-MS chromatogram of Mal-5S

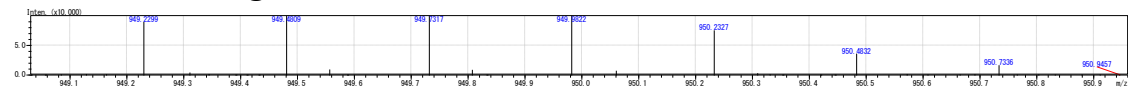

HPLC chromatogram of Mal-5S

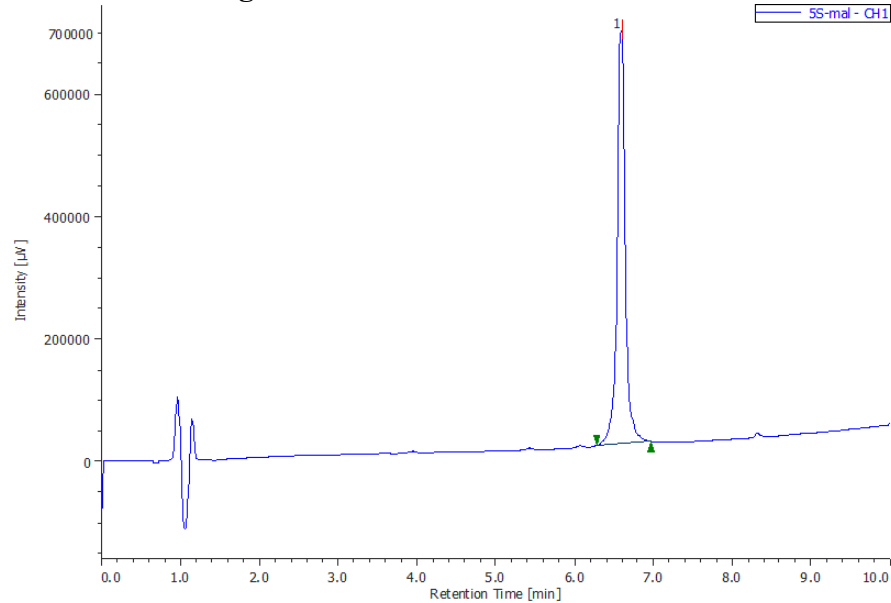

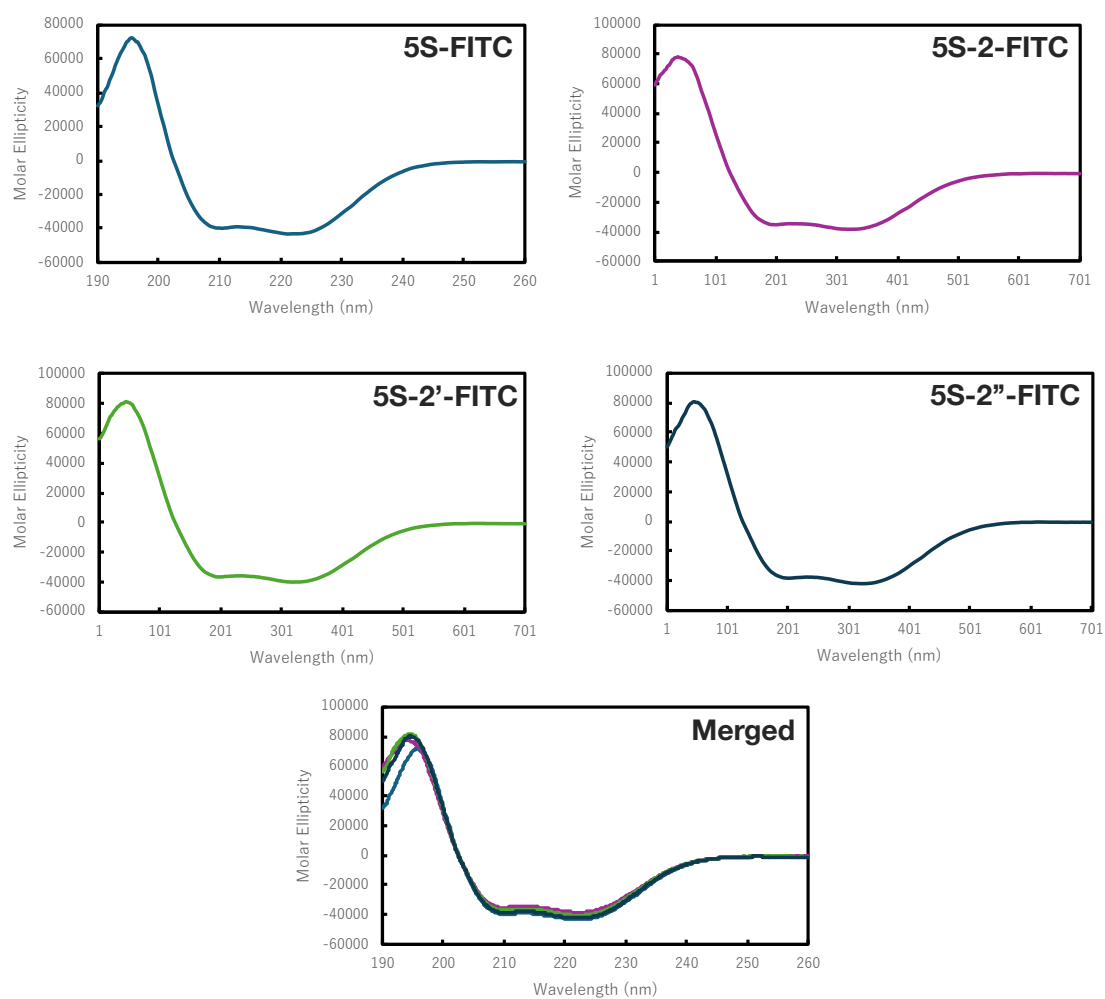

**Figure S1.** CD spectra of 5S-FITC, 5S-2-FITC, 5S-2'-FITC, 5S-2''-FITC and merged spectra of those four peptides. Condition: 100  $\mu$ M in 20 mM phosphate buffer (pH 7.2).

Figure 8b

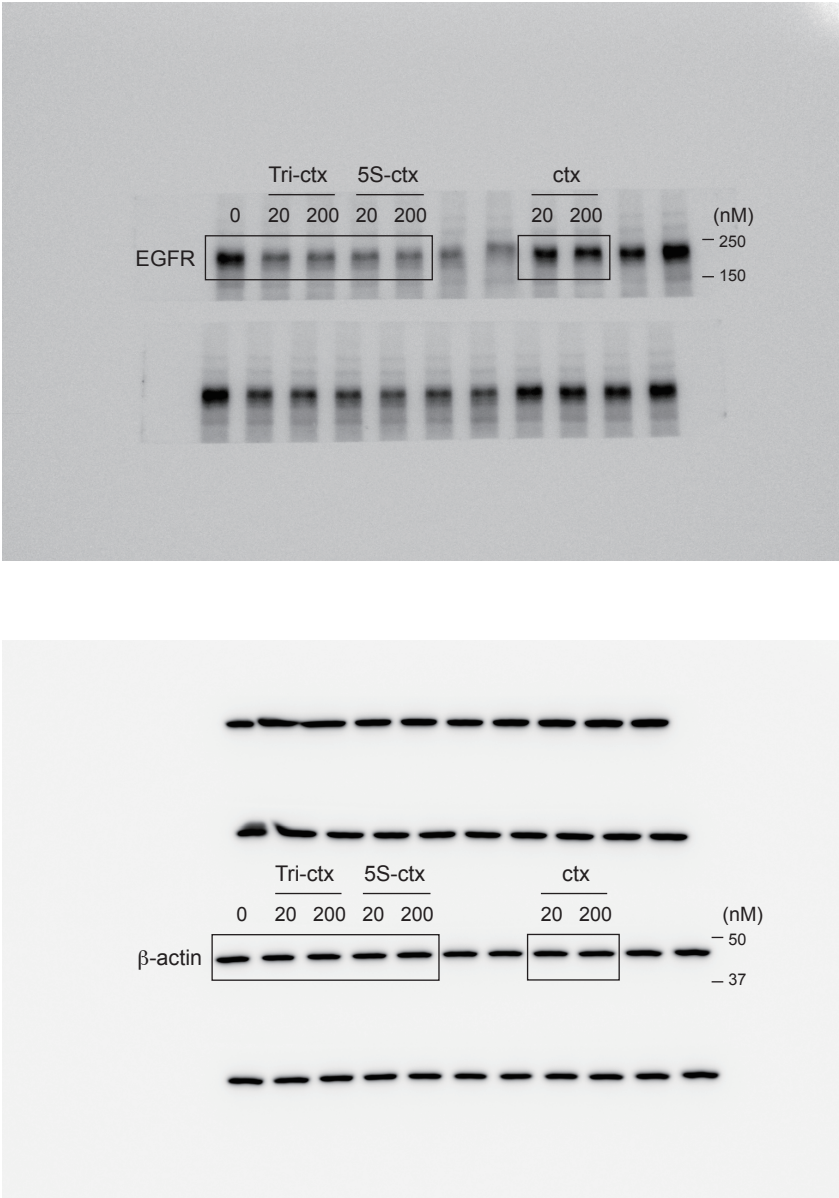

## Chemical structure of mal-Tri-GalNAc

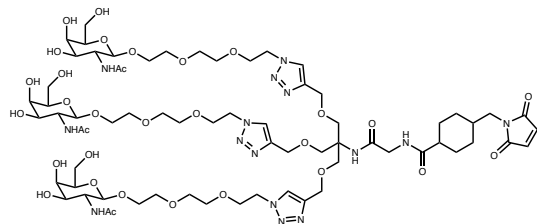

## References

1. B. Thomas, C. Pifferi, G. C. Daskhan, M. Fiore, N. Berthet and O. Renaudet, Divergent and convergent synthesis of GalNAc-conjugated dendrimers using dual orthogonal ligations, *Org Biomol Chem*, 2015, **13**, 11529-11538.
2. T. P. Prakash, M. J. Graham, J. Yu, R. Carty, A. Low, A. Chappell, K. Schmidt, C. Zhao, M. Aghajan, H. F. Murray, S. Riney, S. L. Booten, S. F. Murray, H. Gaus, J. Crosby, W. F. Lima, S. Guo, B. P. Monia, E. E. Swayze and P. P. Seth, Targeted delivery of antisense oligonucleotides to hepatocytes using triantennary N-acetyl galactosamine improves potency 10-fold in mice, *Nucleic Acids Res*, 2014, **42**, 8796-8807.
3. J. T. Yang, C. C. Wu, H. M. Martinez, Calculation of protein conformation from circular dichroism, *Methods Enzymol*, 1986, **130**, 208-269.
4. Y. Kanda, Investigation of the freely available easy-touse software 'EZR' (Easy R) for medical statistics, *Bone Marrow Trasnplant*, 2013, **48**, 452-458.
